# Supplementary material for: One-pot synthesis of cyclophane-type macrocycles using manganese(iii)-mediated oxidative radical cyclization
Source: Royal Society of Chemistry journal article supplement (doi:10.1039/c0ob00683a), 2011-01-01
Supplement: c0ob00683a.pdf [file c0ob00683a.pdf]

## One-pot synthesis of cyclophane-type macrocycles using manganese(III)-mediated oxidative radical cyclization

Yosuke Ito, Yuichi Tomiyasu, Takahiro Kawanabe, Keisuke Uemura, Yuu Ushimizu, and Hiroshi Nishino\*

Department of Chemistry, Graduate School of Science and Technology, Kumamoto University,  
Kurokami 2-39-1, Kumamoto 860-8555, JAPAN  
nishino@sci.kumamoto-u.ac.jp

### Supplementary data

The synthetic procedures and spectroscopic data of the substrates **1**<sub>(m)</sub>, **1**<sub>(o)</sub>, **2**<sub>(n)-arom</sub>, **2**<sub>(CH<sub>2</sub>)<sub>y</sub>-arom, **4**<sub>(m)</sub>, **6**, and **8** with references, and the X-ray data collection and processing parameters of [22]paracyclophane **3**<sub>(8)(1)-para</sub>.</sub>

The terminal alkadienes **1**<sub>(m)</sub> were synthesized by the reaction of the corresponding 1,ω-alkanedicarboxylates with phenylmagnesium bromide followed by acid-catalyzed dehydration.<sup>1,2</sup>

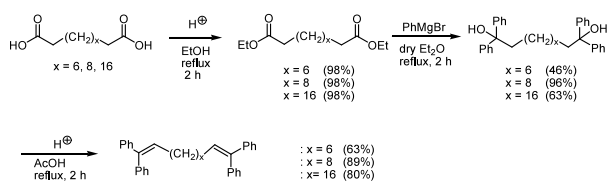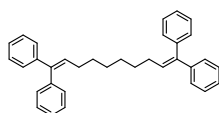

**1,1,10,10-Tetraphenyl-1,9-decadiene (1<sub>(6)</sub>):**  $R_f = 0.83$  ( $\text{CHCl}_3$ ). Colorless microcrystals (from ethanol), m.p. 108-110 °C; IR ( $\text{CHCl}_3$ ):  $\nu$  1597 (C=C)  $\text{cm}^{-1}$ .  $^1\text{H}$  NMR (300MHz,  $\text{CDCl}_3$ ):  $^m$  7.46-7.07 (20H, m, arom. H), 6.05 (2H, t,  $J = 7.5$  Hz, =CH-), 2.07 (4H, dt,  $J = 7.5, 7.5$  Hz, -CH<sub>2</sub>-), 1.46-1.31 (4H, m, -CH<sub>2</sub>-), 1.31-1.17 (4H, m, -CH<sub>2</sub>-) ppm.  $^{13}\text{C}$  NMR (75MHz,  $\text{CDCl}_3$ ):  $^m$  142.8 (2C, >C=), 141.4, 140.3 (4C, arom. C), 130.2, 129.9, 128.1, 128.0, 127.2 (20C, arom. CH), 126.8, 126.7 (2C, =CH-), 29.8, 29.7, 29.0 (6C, -CH<sub>2</sub>-) ppm. Anal. calcd for  $\text{C}_{34}\text{H}_{34}$ : C, 92.26; H, 7.74. Found: C, 92.20; H, 7.86.

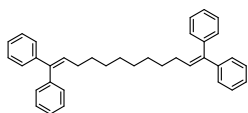

**1,1,12,12-Tetraphenyl-1,11-dodecanediene (1<sub>(8)</sub>):**  $R_f = 0.90$  ( $\text{CHCl}_3$ ). Colorless microcrystals (from ethanol), m.p. 85-86 °C; IR ( $\text{CHCl}_3$ ):  $\nu$  1597 (C=C)  $\text{cm}^{-1}$ .  $^1\text{H}$  NMR (300MHz,  $\text{CDCl}_3$ ):  $^m$  7.15-7.38 (20H, m, arom. H), 6.07 (2H, t,  $J = 7.5$  Hz, =CH-), 2.10 (4H, q,  $J = 7.5$  Hz, - $\text{CH}_2$ -), 1.41 (8H, m, - $\text{CH}_2$ -), 1.24 (4H, m, - $\text{CH}_2$ -) ppm.  $^{13}\text{C}$  NMR (75MHz,  $\text{CDCl}_3$ ):  $^m$  142.8 (2C, >C=), 141.4, 140.3 (4C, arom.C), 130.3, 129.9, 128.1, 127.2 (20C, arom.CH), 126.8, 126.7 (2C, =CH-), 29.9, 29.7, 29.4, 29.2 (8C, - $\text{CH}_2$ -) ppm. FAB HRMS (acetone/NBA): calcd for  $\text{C}_{36}\text{H}_{38}$  470.2974 ( $\text{M}^+$ ); found 470.2980.

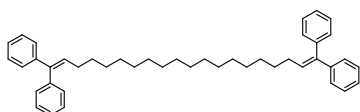

**1,1,20,20-Tetraphenyl-1,19-icosanediene (1<sub>(16)</sub>):**  $R_f = 0.91$  ( $\text{CHCl}_3$ ). Colorless microcrystals (from ethanol), m.p. 64 °C. IR ( $\text{CHCl}_3$ ):  $\nu$  1597 (C=C)  $\text{cm}^{-1}$ .  $^1\text{H}$  NMR (300MHz,  $\text{CDCl}_3$ ):  $^m$  7.40-7.14 (20H, m, arom. H), 6.07 (2H, t,  $J = 7.5$  Hz, =CH-), 2.10 (4H, q,  $J = 7.5$  Hz, - $\text{CH}_2$ -), 1.42 (4H, m, - $\text{CH}_2$ -), 1.23 (24H, m, - $\text{CH}_2$ -) ppm.  $^{13}\text{C}$  NMR (75MHz,  $\text{CDCl}_3$ ):  $^m$  142.7 (2C, >C=), 141.4, 140.3 (4C, arom.C), 130.3, 129.9, 129.4, 128.7, 128.3, 128.05, 128.00, 127.2, 127.1 (20C, arom.CH), 126.75, 126.67 (2C, =CH-), 29.9, 29.7, 29.6, 29.5, 29.3 (16C, - $\text{CH}_2$ -) ppm. FAB HRMS (acetone/NBA): calcd for  $\text{C}_{44}\text{H}_{54}$  582.4226 ( $\text{M}^+$ ); found 582.4202.

4-Oxa-1,1,7,7-tetraphenylheptadiene (**1<sub>(O)</sub>**) was prepared as follows. Alkylation of acetophenone with ethyl bromoacetate and subsequent reduction with lithium aluminum hydride (LAH) gave 1,1-diphenylethane-1,2-diol, which was condensed in 20% $\text{H}_2\text{SO}_4$  aqueous solution to give 4-oxa-1,1,7,7-tetraphenylheptadiene (**1<sub>(O)</sub>**).<sup>1b</sup>

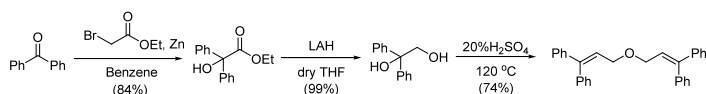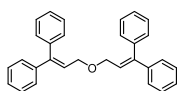

**4-Oxa-1,1,7,7-tetraphenylheptadiene (1<sub>(O)</sub>):**  $R_f = 0.35$  ( $\text{CHCl}_3$ :Hexane = 1:5 v/v). Colorless oil. IR ( $\text{CHCl}_3$ ):  $\nu$  1599 (C=C)  $\text{cm}^{-1}$ .  $^1\text{H}$  NMR (300MHz,  $\text{CDCl}_3$ ):  $^m$  7.30-7.09 (20H, m, arom. H), 6.20 (2H, t,  $J = 6.6$  Hz, =CH-), 4.01 (4H, d,  $J = 6.6$  Hz, - $\text{CH}_2$ -) ppm.  $^{13}\text{C}$  NMR (75MHz,  $\text{CDCl}_3$ ):  $^m$  144.6 (2C, >C=), 141.8 (2C, arom. C), 139.1 (2C, arom. C), 129.7, 128.1, 128.0, 127.6, 127.4, 127.4 (20C, arom. CH), 125.5 (2C, =CH-), 68.0 (2C, - $\text{CH}_2$ -) ppm. FAB HRMS (acetone/NBA/NaI): calcd for  $\text{C}_{30}\text{H}_{26}\text{ONa}$  425.1881 ( $\text{M}^+ + \text{Na}$ ); found 425.1895.

Preparation of the bis(3-oxobutanoate)s **2**<sub>(1)-para</sub> and **2**<sub>(1)-biphen</sub> was as follows. The corresponding phenols were alkylated with ethyl bromoacetate to give the corresponding diesters, which were reduced with LAH to afford the corresponding diols.<sup>3</sup> The diols were converted by the condensation of diketene into bis(3-oxobutanoate)s **2**<sub>(1)-para</sub> and **2**<sub>(1)-biphen</sub>.<sup>1,3</sup>

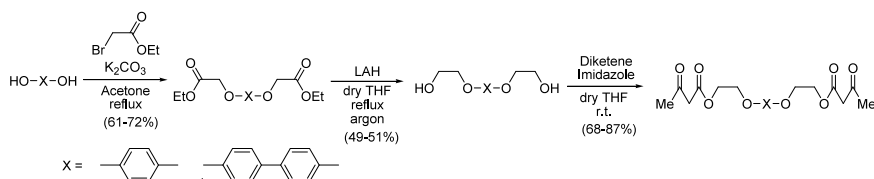

Other bis(3-oxobutanoate)s **2**<sub>(n)-arom</sub> were obtained by the reaction of the corresponding phenols with 2-(2-chloroethoxy)ethanol, 2-[2-(2-chloroethoxy)ethoxy]ethanol, 6-chloro-1-hexanol, or 8-chloro-1-octanol in the presence of potassium carbonate with a catalytic amount of lithium bromide,<sup>5</sup> followed by the condensation of diketene.<sup>1,4</sup>

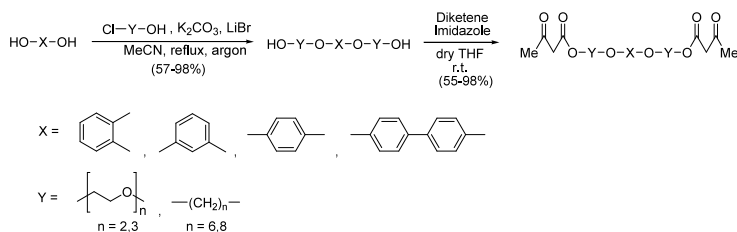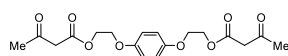

***p*-Phenylenebis(1-oxapropyl) di(3-oxobutanoate) (**2**<sub>(1)-para</sub>)**<sup>6</sup>:  $R_f = 0.24$  (CHCl<sub>3</sub>). Colorless microcrystals (from CHCl<sub>3</sub>-hexane), m.p. 84-85 °C. IR (CHCl<sub>3</sub>):  $\nu$  1745, 1717 (C=O) cm<sup>-1</sup>. <sup>1</sup>H NMR (300 MHz, CDCl<sub>3</sub>):  $\delta$  6.84 (4H, m, arom. H), 4.49-4.46 (4H, m, -CH<sub>2</sub>O-), 4.17-4.13 (4H, m, -CH<sub>2</sub>O-), 3.52, 3.51 (4H, s, -COCH<sub>2</sub>CO-), 2.28, 2.27 (6H, s, -CH<sub>3</sub>) ppm. <sup>13</sup>C NMR (75MHz, CDCl<sub>3</sub>):  $\tau^M$  200.3 (2C, C=O), 167.0 (2C, -CO<sub>2</sub>-), 152.9 (2C, arom. C), 115.7 (4C, arom. CH), 66.3 (2C, -CH<sub>2</sub>O-), 63.6 (2C, -CH<sub>2</sub>O-), 49.8 (2C, -COCH<sub>2</sub>CO-), 30.1 (2C, -CH<sub>3</sub>) ppm.

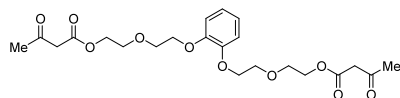

***o*-Phenylenebis(1,4-dioxahexyl) di(3-oxobutanoate) (**2**<sub>(2)-ortho</sub>)**:  $R_f = 0.30$  (CHCl<sub>3</sub>:MeOH = 98:2 v/v). Colorless liquid. IR (CHCl<sub>3</sub>):  $\nu$  1744, 1717 (C=O) cm<sup>-1</sup>. <sup>1</sup>H NMR (300 MHz, CDCl<sub>3</sub>):  $\tau^M$  6.92 (4H, m, arom. H), 4.32 (4H, t,  $J = 4.8$  Hz, -CH<sub>2</sub>O-), 4.16 (4H, t,  $J = 4.8$  Hz, -CH<sub>2</sub>O-), 3.86 (4H, t,  $J = 4.8$  Hz, -CH<sub>2</sub>O-), 3.81 (4H, t,  $J = 4.8$  Hz, -CH<sub>2</sub>O-), 3.48 (4H, s, -COCH<sub>2</sub>CO-), 2.23 (6H, s, -CH<sub>3</sub>) ppm. <sup>13</sup>C NMR (75MHz, CDCl<sub>3</sub>):  $\tau^M$  200.5 (2C, C=O), 167.1 (2C, -CO<sub>2</sub>-), 148.9 (2C, arom. C), 121.7 (2C, arom. CH), 114.8 (2C, arom. CH), 69.7 (2C, -CH<sub>2</sub>O-), 69.1 (2C, -CH<sub>2</sub>O-), 68.9 (2C, -CH<sub>2</sub>O-), 64.4 (2C, -CH<sub>2</sub>O-), 49.9 (2C, -COCH<sub>2</sub>CO-), 30.1 (2C, -CH<sub>3</sub>) ppm. FAB HRMS (acetone/NBA/NaI): calcd for C<sub>22</sub>H<sub>30</sub>O<sub>10</sub>Na 477.1737 (M<sup>+</sup>+Na); found 477.1759.

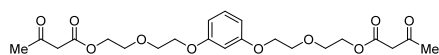

***m*-Phenylenebis(1,4-dioxahexyl) di(3-oxobutanoate) (2<sub>(2)</sub>-*meta*):**  $R_f = 0.28$  (CHCl<sub>3</sub>:MeOH = 98:2 v/v). Colorless liquid. IR (CHCl<sub>3</sub>):  $\nu$  1744, 1717 (C=O) cm<sup>-1</sup>. <sup>1</sup>H NMR (300 MHz, CDCl<sub>3</sub>):  $\tau^m$  7.15 (1H, t,  $J = 8.1$  Hz, arom. H), 6.53 (3H, m, arom. H), 4.31 (4H, t,  $J = 4.5$  Hz, -CH<sub>2</sub>O-), 4.09 (4H, t,  $J = 4.5$  Hz, -CH<sub>2</sub>O-), 3.84-3.81 (4H, m, -CH<sub>2</sub>O-), 3.78-3.75 (4H, m, -CH<sub>2</sub>O-), 3.47 (4H, s, -COCH<sub>2</sub>CO-), 2.23 (6H, s, -CH<sub>3</sub>) ppm. <sup>13</sup>C NMR (75MHz, CDCl<sub>3</sub>):  $\tau^m$  200.2 (2C, C=O), 166.8 (2C, -CO<sub>2</sub>-), 159.5 (2C, arom. C), 129.5 (1C, arom. CH), 106.7 (2C, arom. CH), 101.4 (1C, arom. CH), 69.2 (2C, -CH<sub>2</sub>O-), 68.6 (2C, -CH<sub>2</sub>O-), 67.0 (2C, -CH<sub>2</sub>O-), 63.9 (2C, -CH<sub>2</sub>O-), 49.5 (2C, -COCH<sub>2</sub>CO-), 29.7 (2C, -CH<sub>3</sub>) ppm. FAB HRMS (acetone/NBA): calcd for C<sub>22</sub>H<sub>30</sub>O<sub>10</sub> 454.1839 (M<sup>+</sup>); found 454.1833.

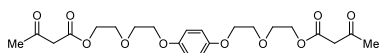

***p*-Phenylenebis(1,4-dioxahexyl) di(3-oxobutanoate) (2<sub>(2)</sub>-*para*):**  $R_f = 0.24$  (CHCl<sub>3</sub>). Colorless liquid. IR (CHCl<sub>3</sub>):  $\nu$  1744, 1717 (C=O) cm<sup>-1</sup>. <sup>1</sup>H NMR (300 MHz, CDCl<sub>3</sub>):  $\tau^m$  6.84 (4H, m, arom. H), 4.33 (4H, t,  $J = 4.8$  Hz, -CH<sub>2</sub>O-), 4.07 (4H, t,  $J = 4.8$  Hz, -CH<sub>2</sub>O-), 3.84-3.77 (8H, m, -CH<sub>2</sub>O-), 3.48 (4H, s, -COCH<sub>2</sub>CO-), 2.26 (6H, s, -CH<sub>3</sub>) ppm. <sup>13</sup>C NMR (75MHz, CDCl<sub>3</sub>):  $\tau^m$  200.4 (2C, C=O), 167.0 (2C, -CO<sub>2</sub>-), 152.8 (2C, arom. C), 115.4 (4C, arom. CH), 69.6 (2C, -CH<sub>2</sub>O-), 68.8 (2C, -CH<sub>2</sub>O-), 67.8 (2C, -CH<sub>2</sub>O-), 64.1 (2C, -CH<sub>2</sub>O-), 49.8 (2C, -COCH<sub>2</sub>CO-), 30.0 (2C, -CH<sub>3</sub>) ppm.

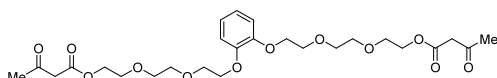

***o*-Phenylenebis(1,4,7-trioxanonanyl) di(3-oxobutanoate) (2<sub>(3)</sub>-*ortho*):**  $R_f = 0.24$  (CHCl<sub>3</sub>:MeOH = 98:2 v/v). Colorless liquid. IR (CHCl<sub>3</sub>):  $\nu$  1744, 1717 (C=O) cm<sup>-1</sup>. <sup>1</sup>H NMR (300 MHz, CDCl<sub>3</sub>):  $\tau^m$  6.92 (4H, m, arom. H), 4.30 (4H, t,  $J = 4.8$  Hz, -CH<sub>2</sub>O-), 4.17 (4H, t,  $J = 4.8$  Hz, -CH<sub>2</sub>O-), 3.86 (4H, t,  $J = 4.8$  Hz, -CH<sub>2</sub>O-), 3.75-3.71 (8H, m, -CH<sub>2</sub>O-), 3.68-3.66 (4H, m, -CH<sub>2</sub>O-), 3.49 (4H, s, -COCH<sub>2</sub>CO-), 2.26 (6H, s, -CH<sub>3</sub>) ppm. <sup>13</sup>C NMR (75MHz, CDCl<sub>3</sub>):  $\tau^m$  200.6 (2C, C=O), 167.1 (2C, -CO<sub>2</sub>-), 148.9 (2C, arom. C), 121.7 (2C, arom. CH), 114.8 (2C, arom. CH), 70.8 (2C, -CH<sub>2</sub>O-), 70.6 (2C, -CH<sub>2</sub>O-), 69.8 (2C, -CH<sub>2</sub>O-), 68.9 (2C, -CH<sub>2</sub>O-), 68.8 (2C, -CH<sub>2</sub>O-), 64.3 (2C, -CH<sub>2</sub>O-), 50.0 (2C, -COCH<sub>2</sub>CO-), 30.1 (2C, -CH<sub>3</sub>) ppm. FAB HRMS (acetone/NBA): calcd for C<sub>26</sub>H<sub>38</sub>O<sub>12</sub> 542.2363 (M<sup>+</sup>); found 542.2355.

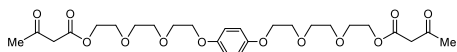

***p*-Phenylenebis(1,4,7-trioxanonanyl) di(3-oxobutanoate) (2<sub>(3)</sub>-*para*):**  $R_f = 0.21$  (CHCl<sub>3</sub>:MeOH = 98:2 v/v). Colorless microcrystals (from CHCl<sub>3</sub>-hexane), m.p. 59-60 °C. IR (CHCl<sub>3</sub>):  $\nu$  1744, 1717 (C=O) cm<sup>-1</sup>. <sup>1</sup>H NMR (300 MHz, CDCl<sub>3</sub>):  $\tau^m$  6.84 (4H, m, arom. H), 4.31 (4H, t,  $J = 4.8$  Hz, -CH<sub>2</sub>O-), 4.07 (4H, t,  $J = 4.8$  Hz, -CH<sub>2</sub>O-), 3.83 (4H, t,  $J = 4.8$  Hz, -CH<sub>2</sub>O-), 3.74-3.66 (12H, m, -CH<sub>2</sub>O-), 3.48 (4H, s, -COCH<sub>2</sub>CO-), 2.26 (6H, s, -CH<sub>3</sub>) ppm. <sup>13</sup>C NMR (75MHz, CDCl<sub>3</sub>):  $\tau^m$  200.5 (2C, C=O), 167.1 (2C, -CO<sub>2</sub>-), 153.0 (2C, arom. C), 115.5 (4C, arom. CH), 70.7 (2C, -CH<sub>2</sub>O-), 70.6 (2C, -CH<sub>2</sub>O-), 69.9 (2C, -CH<sub>2</sub>O-), 68.9 (2C, -CH<sub>2</sub>O-), 68.0 (2C, -CH<sub>2</sub>O-), 64.3 (2C, -CH<sub>2</sub>O-), 49.9 (2C, -COCH<sub>2</sub>CO-), 30.1 (2C, -CH<sub>3</sub>) ppm. FAB HRMS (acetone/NBA): calcd for C<sub>26</sub>H<sub>38</sub>O<sub>12</sub> 542.2363 (M<sup>+</sup>); found 542.2349.

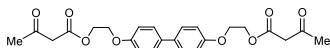

**4,4'-Biphenylenebis(1-oxapropyl) di(3-oxobutanoate) ( $2_{(1)}$ -biphen):**  $R_f = 0.51$  ( $\text{CHCl}_3$ :MeOH = 95:5 v/v). Colorless microcrystals (from  $\text{CHCl}_3$ -hexane), m.p. 99-100 °C. IR ( $\text{CHCl}_3$ ):  $\nu$  1746, 1717 ( $\text{C}=\text{O}$ )  $\text{cm}^{-1}$ .  $^1\text{H}$  NMR (300 MHz,  $\text{CDCl}_3$ ):  $^m$  7.46 (4H, m, arom. H), 6.95 (4H, m, arom. H), 4.54-4.50 (4H, m,  $-\text{CH}_2\text{O}-$ ), 4.24-4.20 (4H, m,  $-\text{CH}_2\text{O}-$ ), 3.514, 3.506 (4H, s,  $-\text{COCH}_2\text{CO}-$ ), 2.28, 2.27 (6H, s,  $-\text{CH}_3$ ) ppm.  $^{13}\text{C}$  NMR (75MHz,  $\text{CDCl}_3$ ):  $^m$  200.3 (2C,  $\text{C}=\text{O}$ ), 167.1 (2C,  $-\text{CO}_2-$ ), 157.6 (2C, arom. C), 133.9 (2C, arom. C), 127.8 (4C, arom. CH), 114.9 (4C, arom. CH), 65.8 (2C,  $-\text{CH}_2\text{O}-$ ), 63.6 (2C,  $-\text{CH}_2\text{O}-$ ), 49.9 (2C,  $-\text{COCH}_2\text{CO}-$ ), 30.2 (2C,  $-\text{CH}_3$ ) ppm. Anal Calcd for  $\text{C}_{24}\text{H}_{26}\text{O}_8 \cdot 1/3\text{H}_2\text{O}$ : C, 64.28; H, 5.99. Found: C, 64.38; H, 5.89.

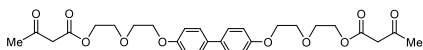

**4,4'-Biphenylenebis(1,4-dioxahexyl) di(3-oxobutanoate) ( $2_{(2)}$ -biphen):**  $R_f = 0.15$  ( $\text{CHCl}_3$ ). Colorless microcrystals (from  $\text{CHCl}_3$ -hexane), m.p. 84-85 °C. IR ( $\text{CHCl}_3$ ):  $\nu$  1744, 1717 ( $\text{C}=\text{O}$ )  $\text{cm}^{-1}$ .  $^1\text{H}$  NMR (300 MHz,  $\text{CDCl}_3$ ):  $^m$  7.46 (4H, m, arom. H), 6.95 (4H, m, arom. H), 4.34 (4H, td,  $J = 4.8, 1.5$  Hz,  $-\text{CH}_2\text{O}-$ ), 4.15 (4H, td,  $J = 4.8, 1.5$  Hz,  $-\text{CH}_2\text{O}-$ ), 3.88 (4H, td,  $J = 4.5, 1.5$  Hz,  $-\text{CH}_2\text{O}-$ ), 3.81 (4H, td,  $J = 4.5, 1.5$  Hz,  $-\text{CH}_2\text{O}-$ ), 3.48 (4H, s,  $-\text{COCH}_2\text{CO}-$ ), 2.27 (6H, s,  $-\text{CH}_3$ ) ppm.  $^{13}\text{C}$  NMR (75MHz,  $\text{CDCl}_3$ ):  $^m$  200.5 (2C,  $\text{C}=\text{O}$ ), 167.1 (2C,  $-\text{CO}_2-$ ), 157.8 (2C, arom. C), 133.6 (2C, arom. C), 127.7 (4C, arom. CH), 114.9 (4C, arom. CH), 69.7 (2C,  $-\text{CH}_2\text{O}-$ ), 69.1 (2C,  $-\text{CH}_2\text{O}-$ ), 67.5 (2C,  $-\text{CH}_2\text{O}-$ ), 64.3 (2C,  $-\text{CH}_2\text{O}-$ ), 50.0 (2C,  $-\text{COCH}_2\text{CO}-$ ), 30.2 (2C,  $-\text{CH}_3$ ) ppm. Anal Calcd for  $\text{C}_{28}\text{H}_{34}\text{O}_{10} \cdot 1/5\text{H}_2\text{O}$ : C, 62.96; H, 6.49. Found: C, 63.12; H, 6.43.

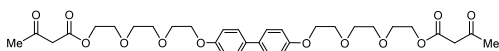

**4,4'-Biphenylenebis(1,4,7-trioxanonanyl) di(3-oxobutanoate) ( $2_{(3)}$ -biphen):**  $R_f = 0.12$  ( $\text{CHCl}_3$ :MeOH = 98:2 v/v). Colorless microcrystals (from  $\text{CHCl}_3$ -hexane), m.p. 84-85 °C. IR ( $\text{CHCl}_3$ ):  $\nu$  1744, 1717 ( $\text{C}=\text{O}$ )  $\text{cm}^{-1}$ .  $^1\text{H}$  NMR (300 MHz,  $\text{CDCl}_3$ ):  $^m$  7.46 (4H, m, arom. H), 6.96 (4H, m, arom. H), 4.31 (4H, t,  $J = 4.5$ ,  $-\text{CH}_2\text{O}-$ ), 4.16 (4H, t,  $J = 4.5$  Hz,  $-\text{CH}_2\text{O}-$ ), 3.87 (4H, t,  $J = 4.5$  Hz,  $-\text{CH}_2\text{O}-$ ), 3.74-3.67 (12H, m,  $-\text{CH}_2\text{O}-$ ), 3.48 (4H, s,  $-\text{COCH}_2\text{CO}-$ ), 2.26 (6H, s,  $-\text{CH}_3$ ) ppm.  $^{13}\text{C}$  NMR (75MHz,  $\text{CDCl}_3$ ):  $^m$  200.5 (2C,  $\text{C}=\text{O}$ ), 167.1 (2C,  $-\text{CO}_2-$ ), 157.9 (2C, arom. C), 133.5 (2C, arom. C), 127.7 (4C, arom. CH), 114.9 (4C, arom. CH), 70.8 (2C,  $-\text{CH}_2\text{O}-$ ), 70.6 (2C,  $-\text{CH}_2\text{O}-$ ), 69.8 (2C,  $-\text{CH}_2\text{O}-$ ), 68.9 (2C,  $-\text{CH}_2\text{O}-$ ), 67.5 (2C,  $-\text{CH}_2\text{O}-$ ), 64.3 (2C,  $-\text{CH}_2\text{O}-$ ), 50.0 (2C,  $-\text{COCH}_2\text{CO}-$ ), 30.1 (2C,  $-\text{CH}_3$ ). Anal Calcd for  $\text{C}_{32}\text{H}_{42}\text{O}_{12} \cdot 1/5\text{H}_2\text{O}$ : C, 61.76; H, 6.87. Found: C, 61.86; H, 6.89.

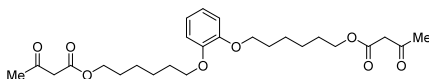

***o*-Phenylenebis(1-oxaheptyl) di(3-oxobutanoate) ( $2_{(\text{CH}_2)_6}$ -ortho):**  $R_f = 0.30$  ( $\text{CHCl}_3$ :MeOH = 98:2 v/v). Colorless oil. IR ( $\text{CHCl}_3$ ):  $\nu$  1717 1734 ( $\text{C}=\text{O}$ )  $\text{cm}^{-1}$ .  $^1\text{H}$  NMR (300 MHz,  $\text{CDCl}_3$ ):  $^m$  6.89 (4H,

m, arom. H), 4.15 (4H, t,  $J = 6.6$  Hz,  $-\text{CH}_2\text{O}-$ ), 4.00 (4H, t,  $J = 6.6$  Hz,  $-\text{CH}_2\text{O}-$ ), 3.45 (4H, s,  $-\text{COCH}_2\text{CO}-$ ), 2.27 (6H, s,  $-\text{CH}_3$ ), 1.85-1.80, 1.71-1.66, 1.52-1.43 (16H, m,  $-\text{CH}_2-$ ) ppm.  $^{13}\text{C}$  NMR (75MHz,  $\text{CDCl}_3$ ):  $^{\text{TM}}$  200.6 (2C,  $\text{C}=\text{O}$ ), 167.2 (2C,  $-\text{CO}_2-$ ), 149.0 (2C, arom. C), 121.1 (2C, arom. CH), 114.0 (2C, arom. CH), 68.9 (2C,  $-\text{CH}_2\text{O}-$ ), 65.3 (2C,  $-\text{CH}_2\text{O}-$ ), 50.0 (2C,  $-\text{COCH}_2\text{CO}-$ ), 30.1 (2C,  $-\text{CH}_3$ ), 29.1, 28.4, 25.64, 25.57 (8C,  $-\text{CH}_2-$ ) ppm. FAB HRMS (acetone/NBA): calcd for  $\text{C}_{26}\text{H}_{38}\text{O}_8$  478.2567 ( $\text{M}^+$ ); found 478.2545.

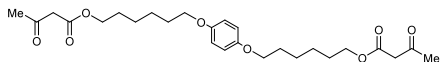

***p*-Phenylenebis(1-oxaheptyl) di(3-oxobutanoate) ( $2_{(\text{CH}_2)_6}$ -*para*):**  $R_f = 0.36$  ( $\text{CHCl}_3$ :MeOH = 98:2 v/v). Colorless microcrystals (from  $\text{CHCl}_3$ -hexane), m.p. 42-43 °C. IR ( $\text{CHCl}_3$ ):  $\nu$  1717, 1734 ( $\text{C}=\text{O}$ )  $\text{cm}^{-1}$ .  $^1\text{H}$  NMR (300 MHz,  $\text{CDCl}_3$ ):  $^{\text{TM}}$  6.81 (4H, m, arom. H), 4.15 (4H, t,  $J = 6.6$  Hz,  $-\text{CH}_2\text{O}-$ ), 3.90 (4H, t,  $J = 6.6$  Hz,  $-\text{CH}_2\text{O}-$ ), 3.45 (4H, s,  $-\text{COCH}_2\text{CO}-$ ), 2.27 (6H, s,  $-\text{CH}_3$ ), 1.79-1.66, 1.52-1.42 (16H, m,  $-\text{CH}_2-$ ) ppm.  $^{13}\text{C}$  NMR (75MHz,  $\text{CDCl}_3$ ):  $^{\text{TM}}$  200.7 (2C,  $\text{C}=\text{O}$ ), 167.2 (2C,  $-\text{CO}_2-$ ), 153.1 (2C, arom. C), 115.3 (4C, arom. CH), 68.3 (2C,  $-\text{CH}_2\text{O}-$ ), 65.4 (2C,  $-\text{CH}_2\text{O}-$ ), 50.1 (2C,  $-\text{COCH}_2\text{CO}-$ ), 30.1 (2C,  $-\text{CH}_3$ ), 29.2, 28.4, 25.7, 25.6 (8C,  $-\text{CH}_2-$ ) ppm. FAB HRMS (acetone/NBA): calcd for  $\text{C}_{26}\text{H}_{38}\text{O}_8$  478.2567 ( $\text{M}^+$ ); found 478.2567.

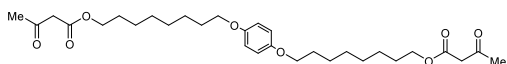

***p*-Phenylenebis(1-oxanonyl) di(3-oxobutanoate) ( $2_{(\text{CH}_2)_8}$ -*para*):**  $R_f = 0.35$  ( $\text{CHCl}_3$ :MeOH = 98:2 v/v). Colorless microcrystals (from  $\text{CHCl}_3$ -hexane), m.p. 58-59 °C. IR ( $\text{CHCl}_3$ ):  $\nu$  1717, 1740 ( $\text{C}=\text{O}$ )  $\text{cm}^{-1}$ .  $^1\text{H}$  NMR (300 MHz,  $\text{CDCl}_3$ ):  $^{\text{TM}}$  6.81 (4H, m, arom. H), 4.14 (4H, t,  $J = 6.6$  Hz,  $-\text{CH}_2\text{O}-$ ), 3.89 (4H, t,  $J = 6.6$  Hz,  $-\text{CH}_2\text{O}-$ ), 3.45 (4H, s,  $-\text{COCH}_2\text{CO}-$ ), 2.27 (6H, s,  $-\text{CH}_3$ ), 1.77-1.63, 1.44-1.35 (24H, m,  $-\text{CH}_2-$ ) ppm.  $^{13}\text{C}$  NMR (75MHz,  $\text{CDCl}_3$ ):  $^{\text{TM}}$  200.5 (2C,  $\text{C}=\text{O}$ ), 167.0 (2C,  $-\text{CO}_2-$ ), 153.0 (2C, arom. C), 115.2 (4C, arom. CH), 68.4 (2C,  $-\text{CH}_2\text{O}-$ ), 65.3 (2C,  $-\text{CH}_2\text{O}-$ ), 49.9 (2C,  $-\text{COCH}_2\text{CO}-$ ), 30.0 (2C,  $-\text{CH}_3$ ), 29.2, 29.1, 28.9, 28.3, 25.8, 25.6 (12C,  $-\text{CH}_2-$ ) ppm. FAB HRMS (acetone/NBA): calcd for  $\text{C}_{30}\text{H}_{46}\text{O}_8$  534.3193 ( $\text{M}^+$ ); found 534.3204.

The oxamethylene-tethered terminal dienes  $4_{(\text{m})}$  were prepared by the Williamson ether synthesis of the corresponding diols with 1,1-diphenyl-3-bromopropene which was synthesized by the bromination of 1,1-diphenylpropene.<sup>8,9</sup>

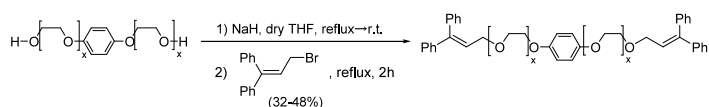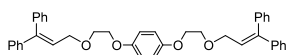

***p*-Phenylenebis(1,4-dioxa-7,7-diphenyl-6-heptene) ( $4_{(1)}$ ):**  $R_f = 0.50$  ( $\text{CHCl}_3$ ). Yellow oil. IR

(CHCl<sub>3</sub>):  $\nu$  1599 (C=C) cm<sup>-1</sup>. <sup>1</sup>H NMR (300 MHz, CDCl<sub>3</sub>):  $\tau^m$  7.39-7.17 (20H, m, arom. H), 6.82 (4H, m, arom. H), 6.26 (2H, t,  $J$  = 6.6 Hz, =CH-), 4.15 (4H, d,  $J$  = 6.6 Hz, =CHCH<sub>2</sub>-), 4.05 (4H, t,  $J$  = 4.8 Hz, -OCH<sub>2</sub>-), 3.74 (4H,  $J$  = 4.8 Hz, -OCH<sub>2</sub>-) ppm. <sup>13</sup>C NMR (75 MHz, CDCl<sub>3</sub>):  $\tau^m$  153.0 (2C, >C=), 144.9 (2C, arom. C), 141.8 (2C, arom. C), 139.2 (2C, arom. C), 129.8, 128.2, 128.1, 127.6, 127.54, 127.50 (20C, arom. CH), 125.4 (2C, =CH-), 115.5 (4C, arom. CH), 69.0, 68.7, 67.9 (6C, -OCH<sub>2</sub>-) ppm. FAB HRMS (acetone/NBA): calcd for C<sub>40</sub>H<sub>38</sub>O<sub>4</sub> 582.2770 (M<sup>+</sup>); found 582.2787.

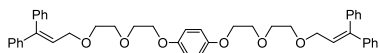

***p*-Phenylenebis(1,4,7-trioxa-10,10-diphenyl-9-decene) (4<sub>(2)</sub>):**  $R_f$  = 0.17 (CHCl<sub>3</sub>). Yellow oil. IR (CHCl<sub>3</sub>):  $\nu$  1599 (C=C) cm<sup>-1</sup>. <sup>1</sup>H NMR (300 MHz, CDCl<sub>3</sub>):  $\tau^m$  7.34-7.14 (20H, m, arom. H), 6.82 (4H, m, arom. H), 6.25 (2H, t,  $J$  = 6.6 Hz, =CH-), 4.10 (4H, d,  $J$  = 6.6 Hz, =CHCH<sub>2</sub>-), 4.05 (4H, t,  $J$  = 4.8 Hz, -OCH<sub>2</sub>-), 3.80 (4H,  $J$  = 4.8 Hz, -OCH<sub>2</sub>-), 3.71-3.67 (4H, m, -OCH<sub>2</sub>-), 3.60-3.57 (4H, m, -OCH<sub>2</sub>-) ppm. <sup>13</sup>C NMR (75 MHz, CDCl<sub>3</sub>):  $\tau^m$  152.9 (2C, >C=), 144.4 (2C, arom. C), 141.7 (2C, arom. C), 139.1 (2C, arom. C), 129.6, 128.03, 128.00, 127.5, 127.4 (20C, arom. CH), 125.4 (2C, =CH-), 115.4 (4C, arom. CH), 70.7, 69.7, 69.4, 68.8, 67.9 (10C, -OCH<sub>2</sub>-) ppm. FAB HRMS (acetone/NBA/NaI): calcd for C<sub>44</sub>H<sub>46</sub>O<sub>6</sub>Na 693.3192 (M<sup>+</sup> +Na); found 693.3229.

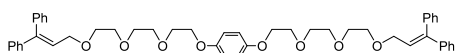

***p*-Phenylenebis(1,4,7,10-tetraoxa-13,13-diphenyl-12-tridecene) (4<sub>(3)</sub>):**  $R_f$  = 0.18 (CHCl<sub>3</sub>). Yellow oil. IR (CHCl<sub>3</sub>):  $\nu$  1599 (C=C) cm<sup>-1</sup>. <sup>1</sup>H NMR (300 MHz, CDCl<sub>3</sub>):  $\tau^m$  7.38-7.14 (20H, m, arom. H), 6.82 (4H, m, arom. H), 6.23 (2H, t,  $J$  = 6.6 Hz, =CH-), 4.09 (4H, d,  $J$  = 6.6 Hz, =CHCH<sub>2</sub>-), 4.05 (4H, t,  $J$  = 4.8 Hz, -OCH<sub>2</sub>-), 3.81 (4H,  $J$  = 4.8 Hz, -OCH<sub>2</sub>-), 3.73-3.70 (6H, m, -OCH<sub>2</sub>-), 3.68-3.63 (6H, m, -OCH<sub>2</sub>-), 3.59-3.55 (4H, m, -OCH<sub>2</sub>-) ppm. <sup>13</sup>C NMR (75 MHz, CDCl<sub>3</sub>):  $\tau^m$  153.0 (2C, >C=), 144.5 (2C, arom. C), 141.8 (2C, arom. C), 139.2 (2C, arom. C), 130.1, 129.7, 128.9, 128.5, 128.1, 127.6, 127.5 (20C, arom. CH), 125.6 (2C, =CH-), 115.5 (4C, arom. CH), 70.7, 70.6, 69.8, 69.5, 68.9, 68.0 (14C, -OCH<sub>2</sub>-) ppm. FAB HRMS (acetone/NBA/NaI): calcd for C<sub>48</sub>H<sub>54</sub>O<sub>8</sub>Na 781.3716 (M<sup>+</sup> +Na); found 781.3727.

*p*-Phenylenebis(7,7-diphenyl-6-heptene) **6** and *p*-phenylenebis(heptyl) bis(3-oxobutanoate) **8** were prepared as follows. The reaction of terephthaloyl dichloride with 1-morpholino-1-cyclohexene followed by the decomposition with sodium hydroxide in ethanol, the Wolff-Kishner reduction,<sup>10</sup> and then esterification gave diethyl *p*-phenylenebis(heptanoate). The *p*-phenylenebis(heptanoate) underwent the Grignard reaction followed by dehydration to give *p*-Phenylenebis(7,7-diphenyl-6-heptene) **6**. While the reduction of the *p*-phenylenebis(heptanoate) followed by esterification with diketene to give *p*-phenylenebis(heptyl) bis(3-oxobutanoate) **8**.<sup>1,4</sup>

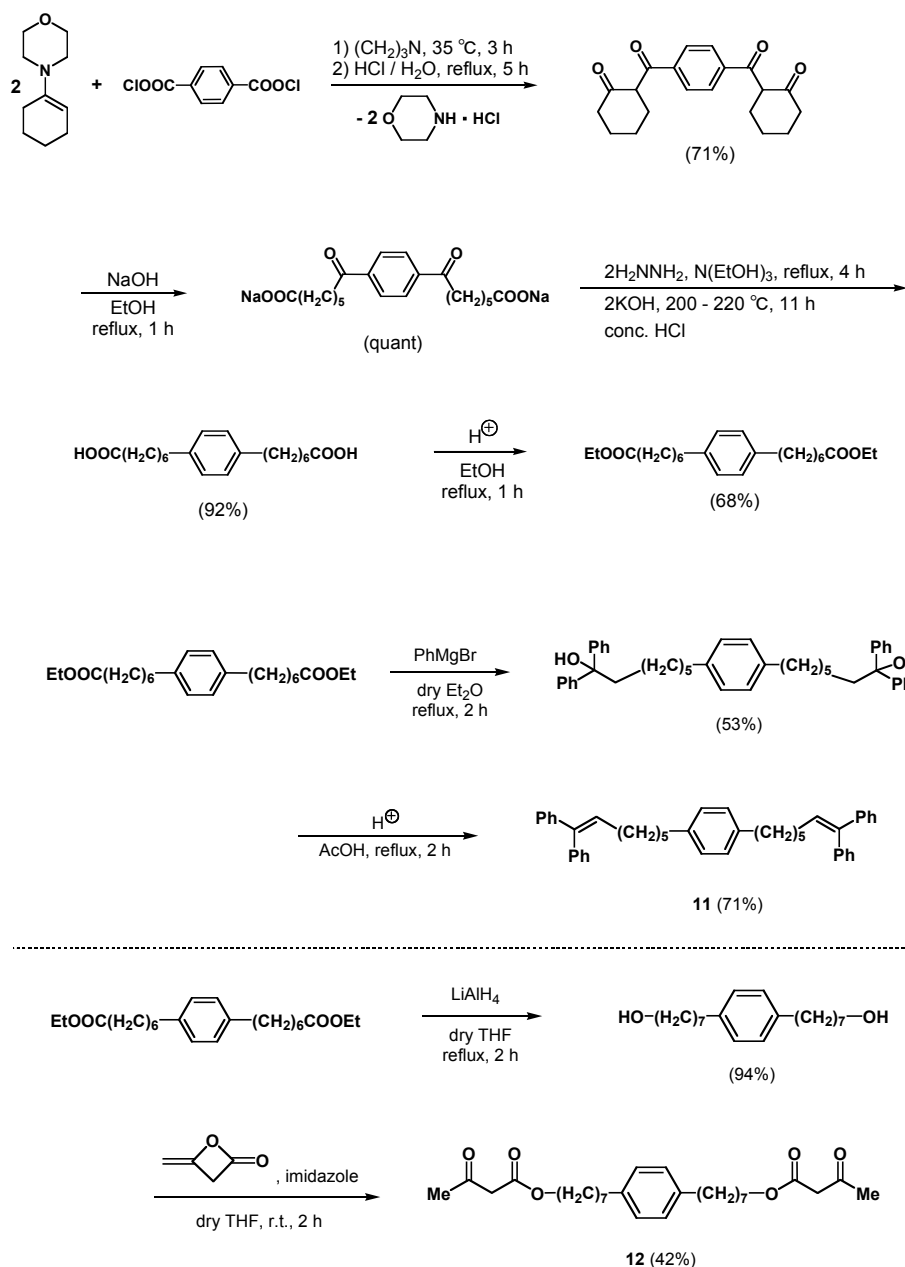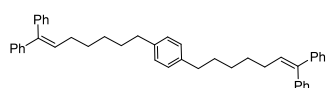

***p*-Phenylenebis(7,7-diphenyl-6-heptene) (6):**  $R_f = 0.50$  (CHCl<sub>3</sub>). Colorless microcrystals (from CHCl<sub>3</sub>-hexane), m.p. 76-77 °C. IR (CHCl<sub>3</sub>):  $\nu$  1599 (C=C) cm<sup>-1</sup>. <sup>1</sup>H NMR (300 MHz, CDCl<sub>3</sub>): <sup>TM</sup> 7.38-7.14 (20H, m, arom. H), 7.04 (4H, m, arom. H), 6.06 (2H, t,  $J = 6.6$  Hz, =CH-), 2.53 (4H, t,  $J = 7.3$  Hz, -CH<sub>2</sub>-), 2.09 (4H, q,  $J = 7.2$  Hz, =CHCH<sub>2</sub>-), 1.57-1.37 (8H, m, -CH<sub>2</sub>-), 1.35-1.30 (4H, m, -CH<sub>2</sub>-) ppm. <sup>13</sup>C NMR (75 MHz, CDCl<sub>3</sub>): <sup>TM</sup> 142.8 (2C, >C=), 141.4 (2C, arom. C), 140.2 (2C, arom. C), 139.9 (2C, arom. C), 130.2, 130.0 (4C, arom. C), 128.2, 128.1, 128.0, 127.7, 127.2, 126.8 (20C, arom.CH), 126.7 (2C, =CH-), 35.4, 31.4, 29.8, 29.6, 28.9 (10C, -CH<sub>2</sub>-) ppm. FAB HRMS (acetone/NBA): calcd for C<sub>44</sub>H<sub>46</sub> 574.3600 (M<sup>+</sup>); found 574.3601.



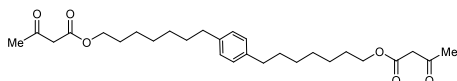

***p*-Phenylenebis(heptyl) bis(3-oxobutanoate) (8):**  $R_f = 0.27$  ( $\text{CHCl}_3$ ). Colorless oil. IR ( $\text{CHCl}_3$ ):  $\nu$  1740, 1717 ( $\text{C}=\text{O}$ )  $\text{cm}^{-1}$ .  $^1\text{H}$  NMR (300 MHz,  $\text{CDCl}_3$ ):  $\tau^m$  7.07 (4H, m, arom. H), 4.12 (4H, t,  $J = 6.6$  Hz,  $-\text{CH}_2\text{O}-$ ), 3.44 (4H, s,  $-\text{COCH}_2\text{CO}-$ ), 2.56 (4H, t,  $J = 7.2$  Hz,  $-\text{PhCH}_2-$ ), 2.20 (6H, s,  $-\text{CH}_3$ ), 1.61-1.35, 1.34-1.20 (20H, m,  $-\text{CH}_2-$ ) ppm.  $^{13}\text{C}$  NMR (75MHz,  $\text{CDCl}_3$ ):  $\tau^m$  200.4 (2C,  $\text{C}=\text{O}$ ), 167.0 (2C,  $-\text{CO}_2-$ ), 139.7 (2C, arom. C), 128.1 (4C, arom. CH), 65.3 (2C,  $-\text{CH}_2\text{O}-$ ), 49.9 (2C,  $-\text{COCH}_2\text{CO}-$ ), 35.3, 31.3 (4C,  $-\text{CH}_2-$ ), 30.0 (2C,  $-\text{CH}_3$ ), 29.0, 28.9, 28.3, 25.6 (8C,  $-\text{CH}_2-$ ) ppm. FAB HRMS (acetone/NBA): calcd for  $\text{C}_{28}\text{H}_{43}\text{O}_6$  475.3060 (M+H); found 475.3062.

### References in Supplementary Data

1. (a) J. Ouyang, H. Nishino, K. Kurosawa, *J. Heterocycl. Chem.* **1995**, *32*, 1783-1791. (b) T. Yoshinaga, H. Nishino, K. Kurosawa, *Tetrahedron Lett.* **1998**, *39*, 9197-9200. (c) F. A. Chowdhury, H. Nishino, K. Kurosawa, *Heterocycl. Commun.* **1999**, *5*, 111-112.
2. K. Mizuno, T. Tamai, I. Hashida, Y. Otsuji, Y. Kuriyama, K. Tokumaru, *J. Org. Chem.* **1994**, *59*, 7329-7334.
3. S. K. Armstrong, R. J. Cross, L. J. Farrugia, D. A. Nichols, A. Perry, *Eur. J. Inorg. Chem.* **2002**, 141-151.
4. (a) F. Cohen, S. K. Collins, L. E. Overman, *Org. Lett.* **2003**, *5*, 4485-4488. (b) G.-Y. Li, C.-M. Che, *Org. Lett.* **2004**, *6*, 1621-1623.
5. S. Nygaard, K. C.-F. Leung, I. Aprahamian, T. Ikeda, S. Saha, B. W. Laursen, S.-Y. Kim, S. W. Hansen, P. C. Stein, A. H. Flood, J. F. Stoddart, J. O. Jeppesen, *J. Am. Chem. Soc.* **2007**, *129*, 960-970.
6. F. Seyama, T. Tsuchida, M. Kondo, *Jpn. Kokai Tokkyo Koho*, **1990**, *8*, 507; Japan Patent 02175187.
7. B. Bruno, T. Gunther *United States Patent Office*, **1962**, US Patent 2771484.
8. K. Maruyama, Y. Kubo, *J. Org. Chem.* **1981**, *46*, 3612-3622.
9. S. Jogo, H. Nishino, M. Yasutake, T. Shinmyozu, *Tetrahedron Lett.* **2002**, *43*, 9031-9034.
10. S. Hunig, E. Lucke, W. Brenninger, *Org. Synth.* **1973**, *Col. Vol. 5*, 533-539 and 808-809.

Table 5. The X-ray data collection and processing parameters of [22]paracyclophane **3**<sub>(8)(1)-para</sub>**A. Crystal Data**

|                                       |                                                                                                                                                               |
|---------------------------------------|---------------------------------------------------------------------------------------------------------------------------------------------------------------|
| Empirical Formula                     | C <sub>54</sub> H <sub>56</sub> O <sub>8</sub>                                                                                                                |
| Formula Weight                        | 833.03                                                                                                                                                        |
| Crystal Color, Habit                  | colorless, block                                                                                                                                              |
| Crystal Dimensions                    | 0.90 X 0.80 X 0.70 mm                                                                                                                                         |
| Crystal System                        | monoclinic                                                                                                                                                    |
| Lattice Type                          | C-centered                                                                                                                                                    |
| No. of Reflections Used for Unit      |                                                                                                                                                               |
| Cell Determination (2 $\theta$ range) | 25 ( 30.1 - 34.2° )                                                                                                                                           |
| Omega Scan Peak Width at Half-height  | 0.27°                                                                                                                                                         |
| Lattice Parameters                    | $a = 14.5489(17) \text{ \AA}$<br>$b = 31.423(9) \text{ \AA}$<br>$c = 11.6090(13) \text{ \AA}$<br>$\beta = 118.413(8)^\circ$<br>$V = 4668.0(14) \text{ \AA}^3$ |
| Space Group                           | C2/c (#15)                                                                                                                                                    |
| Z value                               | 4                                                                                                                                                             |
| Dcalc                                 | 1.185 g/cm <sup>3</sup>                                                                                                                                       |
| F000                                  | 1776.00                                                                                                                                                       |
| m(Mo $K\alpha$ )                      | 0.784 cm <sup>-1</sup>                                                                                                                                        |

**B. Intensity Measurements**

|                              |                                                                            |
|------------------------------|----------------------------------------------------------------------------|
| Diffractometer               | Rigaku AFC7R                                                               |
| Radiation                    | Mo $K\alpha$ ( $\lambda = 0.71069 \text{ \AA}$ )<br>graphite monochromated |
| Attenuator                   | Zr foil (factor = 8.43)                                                    |
| Take-off Angle               | 6.0°                                                                       |
| Detector Aperture            | 3.0 mm horizontal<br>3.0 mm vertical                                       |
| Crystal to Detector Distance | 235 mm                                                                     |
| Voltage, Current             | 50 kV, 100 mA                                                              |
| Temperature                  | 25.0 °C                                                                    |
| Scan Type                    | $\omega$                                                                   |
| Scan Rate                    | 16.0°/min (in $\omega$ ) (up to 2 scans)                                   |
| Scan Width                   | (1.73 + 0.30 $\tan \theta$ )°                                              |
| 2 $\theta$ <sub>max</sub>    | 55.0°                                                                      |
| No. of Reflections Measured  | Total: 6419<br>Unique: 5364 ( $R_{\text{int}} = 0.124$ )                   |
| Corrections                  | Lorentz-polarization                                                       |

Absorption  
 (trans. factors: 0.735 - 0.947)  
 Decay (36.48% decline)  
 Secondary Extinction  
 (coefficient: 2.45440e+002)

---

### C. Structure Solution and Refinement

|                                           |                                                |
|-------------------------------------------|------------------------------------------------|
| Structure Solution                        | Direct Methods (SIR92)                         |
| Refinement                                | Full-matrix least-squares on $F^2$             |
| Function Minimized                        | $\Sigma w (F_o^2 - F_c^2)^2$                   |
| Least Squares Weights                     | $1/\sigma^2(F_o^2) = 1/\sigma^2(F_o)/(4F_o^2)$ |
| $2\theta_{\max}$ cutoff                   | 55.0°                                          |
| Anomalous Dispersion                      | All non-hydrogen atoms                         |
| No. Observations ( $I > 2.00\sigma(I)$ )  | 2891                                           |
| No. Variables                             | 309                                            |
| Reflection/Parameter Ratio                | 9.36                                           |
| Residuals: $R^1$ ( $I > 2.00\sigma(I)$ )  | 0.0878                                         |
| Residuals: $wR^2$ ( $I > 2.00\sigma(I)$ ) | 0.1042                                         |
| Goodness of Fit Indicator                 | 4.749                                          |
| Max Shift/Error in Final Cycle            | 0.001                                          |
| Maximum peak in Final Diff. Map           | 0.86 e <sup>-</sup> /Å <sup>3</sup>            |
| Minimum peak in Final Diff. Map           | -0.77 e <sup>-</sup> /Å <sup>3</sup>           |

---

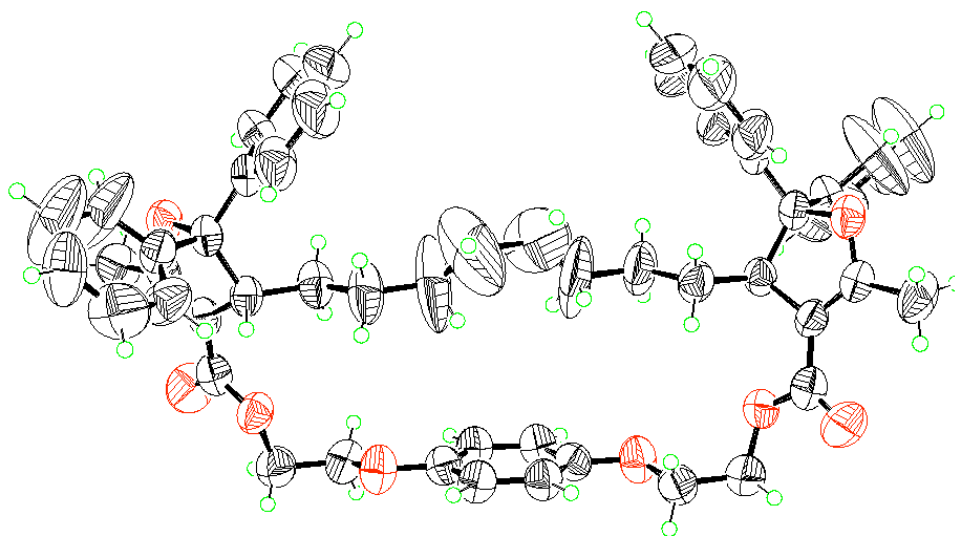

Figure 3. ORTEP Drawing of [22]paracyclophane **3**<sub>(8)(1)-para</sub>
